# Supplementary material for: Adaptive periodicity in the infectivity of malaria gametocytes to mosquitoes
Source: Proc Biol Sci. 2018 Oct 3;285(1888):20181876. doi: 10.1098/rspb.2018.1876 (PMC6191691; doi:10.1098/rspb.2018.1876)
Supplement: SI figure 1-9 [file rspb20181876supp1.pdf]

1    **Adaptive periodicity in the infectivity of malaria gametocytes to mosquitoes**

2    **Supporting information**

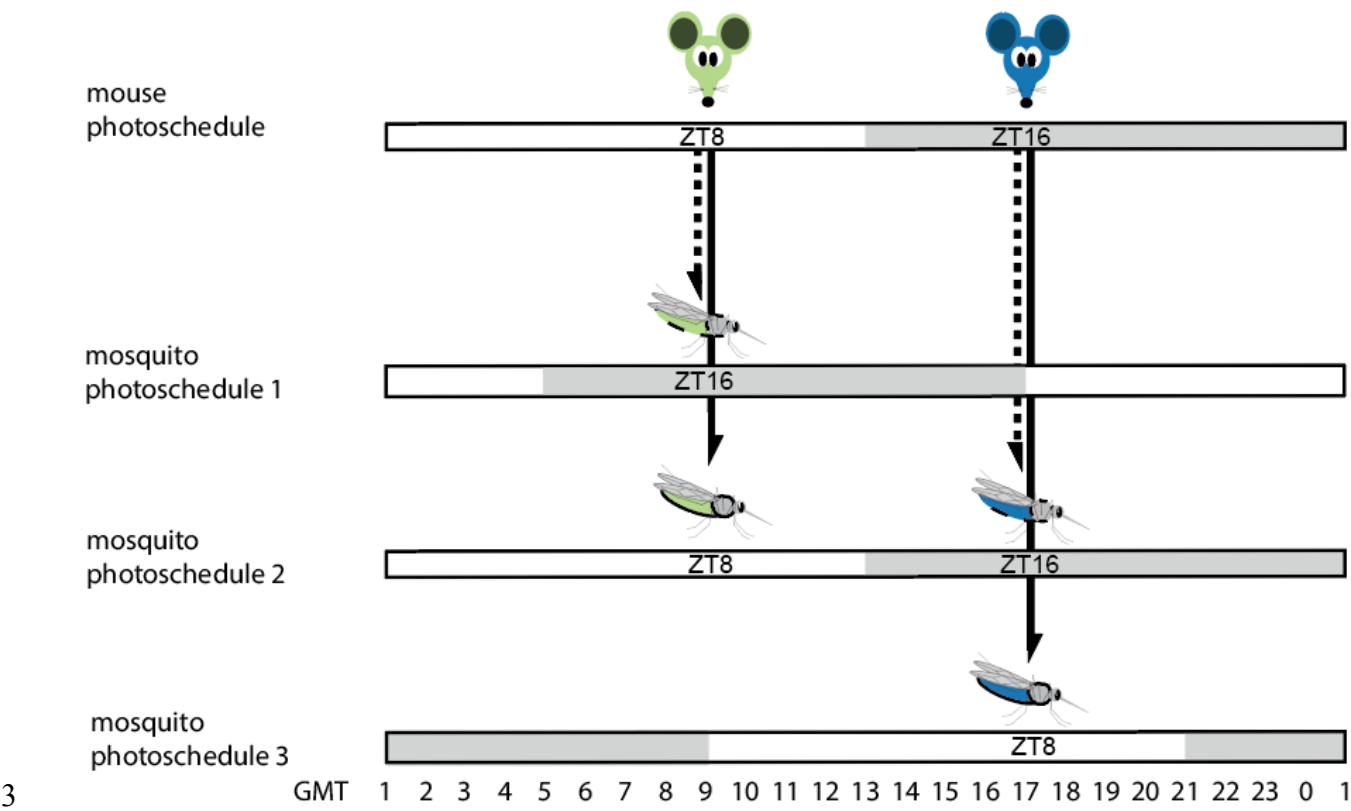

3

4

5    **SI Figure 1. Offset photoschedules used in our experiment.** We reared all experimental mice in

6    the same photoschedule, with lights on at 1:00 GMT and off at 13:00 GMT. To cross factor “time

7    zones” for parasites and vectors we entrained mosquitoes to three offset photoschedules where

8    lights on and lights off occurred at different times with respect to GMT (though always in a 12:12

9    hrs light:dark cycle). Mosquito photoschedule 1 provided mosquitoes at their ZT16 to feed on ZT8

10    mice (green, dotted arrow). Mosquito photoschedule 2 provided mosquitoes experiencing their

11    ZT8 to feed on mice experiencing ZT8 (green, solid arrow) as well as mosquitoes experiencing their

12    ZT16 to feed on mice experiencing ZT16 (blue, dotted arrow). Mosquito photoschedule 3 provided

13    mosquitoes at their ZT8 to feed on mice experiencing ZT16 (blue, solid arrow).

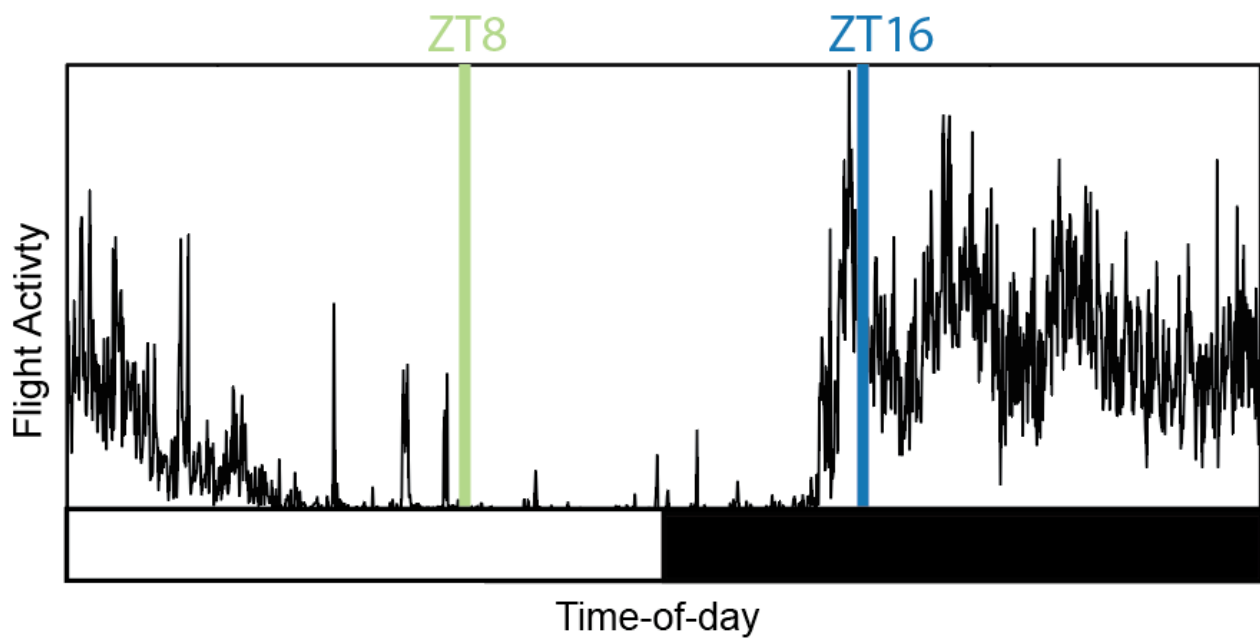

14

15 **SI Figure 2. *An. stephensi* display daily rhythms in flight activity.** White and black bars indicate  
 16 lights on and off. Shown is the average 24-hr activity profile averaged over 3 days of activity for 32  
 17 females. Locomotor Activity Monitor units (LAM 25) (TriKinetics, Waltham, MA, USA) record  
 18 individual mosquito locomotor flight activity and we processed data using ClockLab software  
 19 (Actimetrics, Wilmette IL). Recordings were performed on female mosquitoes from the same  
 20 cohort as the experimental mosquitoes used in this study and began on the day we gave blood  
 21 meals to the experimental mosquitoes at the times indicated by the green and blue lines.

22

23

24

25

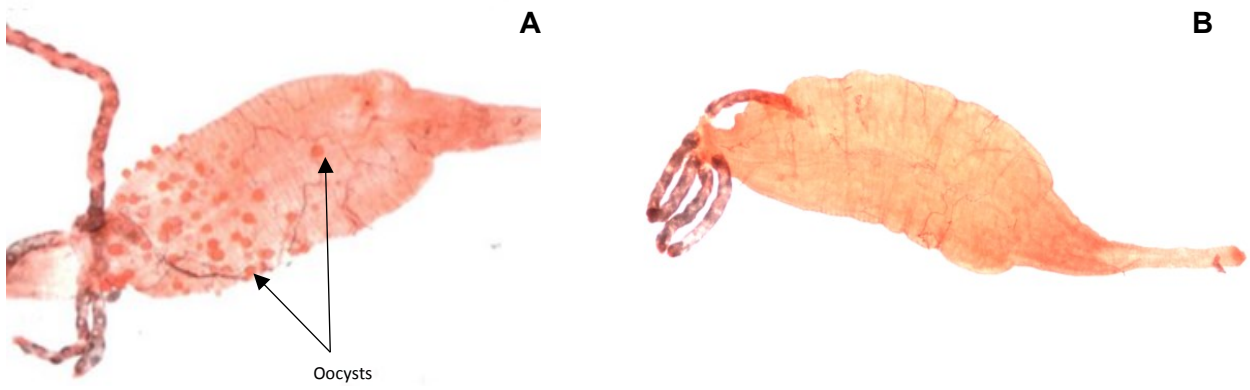

**SI Figure 3.** Example midguts with (A) and without (B) oocysts.

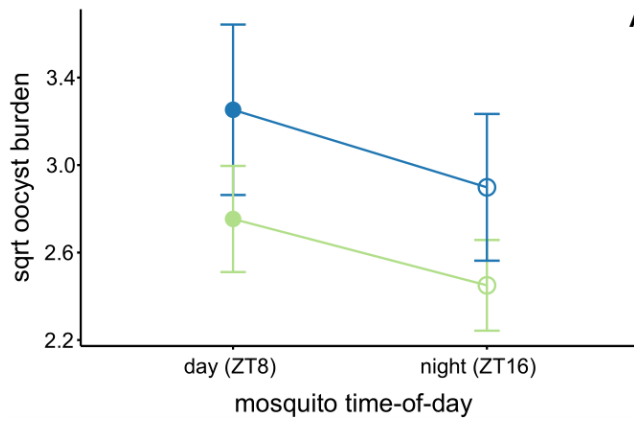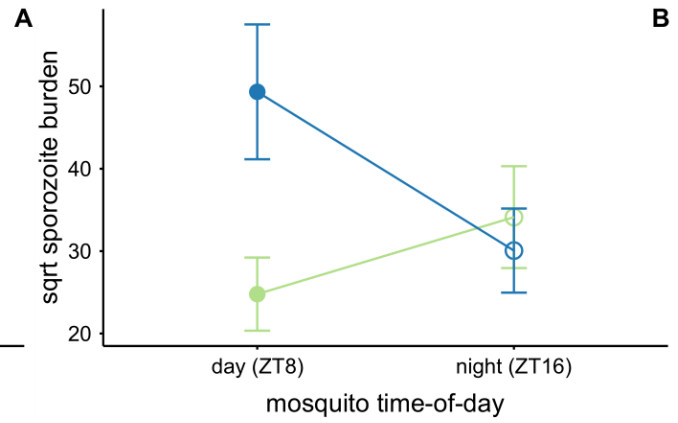

**OocDens~ ParTime\*MosqTime\*Block**

|                        |                            |
|------------------------|----------------------------|
| ParTime:MosqTime:Block | $\chi^2_1 = 0.10, P=0.812$ |
| ParTime:MosqTime       | $\chi^2_1 = 0.01, P=0.928$ |
| MosqTime:Block         | $\chi^2_1 = 0.16, P=0.761$ |
| ParTime:Block          | $\chi^2_1 = 0.19, P=0.741$ |
| Block                  | $\chi^2_1 = 0.05, P=0.862$ |
| MosqTime               | $\chi^2_1 = 2.00, P=0.276$ |
| ParTime                | $\chi^2_1 = 4.16, P=0.117$ |

**SporDens~ ParTime\*MosqTime\*Block**

|                        |                            |
|------------------------|----------------------------|
| ParTime:MosqTime:Block | $\chi^2_1 = 0.99, P=0.320$ |
| MosqTime:Block         | $\chi^2_1 = 2.02, P=0.156$ |
| ParTime:Block          | $\chi^2_1 = 2.55, P=0.110$ |
| ParTime:MosqTime       | $\chi^2_1 = 4.02, P=0.045$ |
| Block                  | $\chi^2_1 = 7.43, P=0.006$ |

**SI Fig 4.** Oocyst burdens of individual infected mosquitoes are not influenced by time-of-day for parasites or the mosquitoes (A). Parasite and mosquito time-of-day do affect sporozoite burdens of infected pools of mosquitoes (B). Each sample in B consisted of a pool of 5 mosquitoes that blood fed on the same mouse (4 samples per mouse): a positive pool requires that at least 1 of 5 mosquitoes were infected with sporozoites. Data presented are mean  $\pm$  SEM burdens. Groups are: daytime (ZT8; closed symbols) and night time (ZT16; open symbols) feeding mosquitoes that fed on mice experiencing their day (ZT8; green) or night (ZT16; blue). Results of the statistical analyses including nonsignificant variables removed from each model are presented below each figure. Oocyst and sporozoite burdens were analysed by linear mixed models, with densities square root transformed to meet model assumptions. Mouse was used as a random effect (multiple (pools of) mosquitoes fed on each mouse). ParTime: parasite time, ZT8 or ZT16; MosqTime: mosquito time, ZT8 or ZT16.

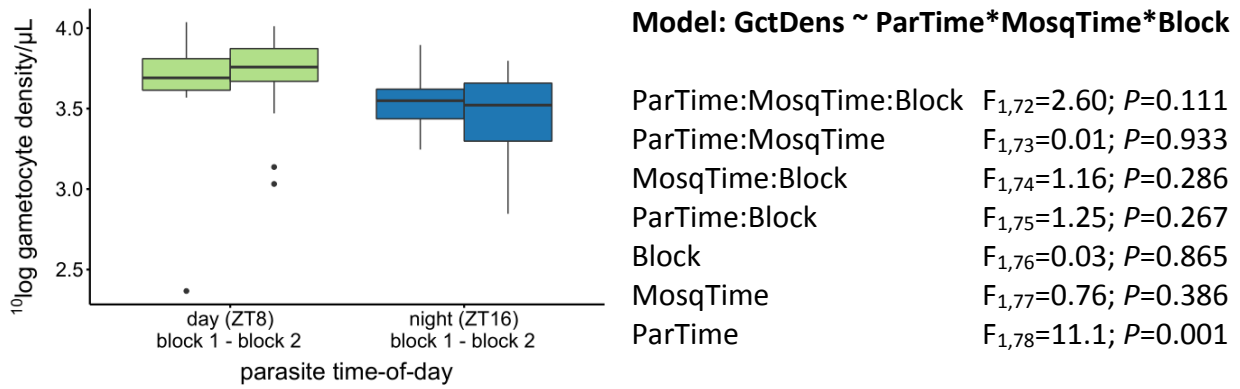

**SI Figure 5.** Gametocyte densities circulating in host blood are lower during the night time (ZT16) than the daytime (ZT8) in both experimental blocks. N=20 mice per group. The data and analysis are summarised in Fig. 2 in the main text but split into blocks 1 and 2 to illustrate between-repeat variability, and results of the statistical analysis including nonsignificant variables removed from the model. Gametocyte densities were analysed with linear models, with gametocyte densities  $^{10}\log$  transformed to meet model assumptions. GctDens: gametocyte density; ParTime: parasite time, ZT8 or ZT16; MosqTime: mosquito time, ZT8 or ZT16.

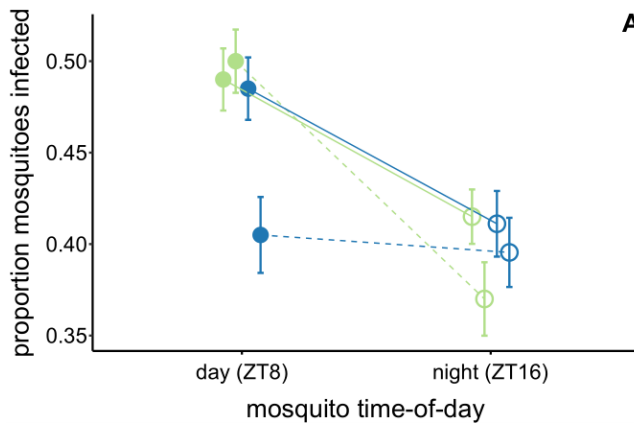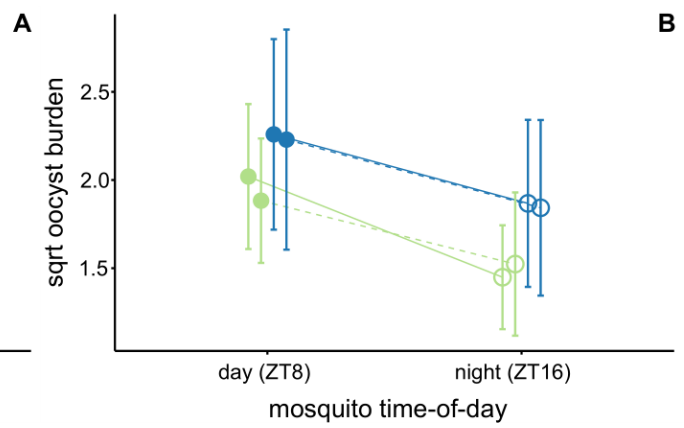

**(Inf, Uninf)~ParTime\*MosqTime\*Block**

|                        |                            |
|------------------------|----------------------------|
| ParTime:MosqTime:Block | $\chi^2_1 = 1.45, P=0.229$ |
| MosqTime:Block         | $\chi^2_1 = 0.01, P=0.943$ |
| ParTime:Block          | $\chi^2_1 = 0.38, P=0.537$ |
| ParTime:MosqTime       | $\chi^2_1 = 1.52, P=0.218$ |
| ParTime                | $\chi^2_1 = 0.60, P=0.437$ |
| Block                  | $\chi^2_1 = 1.72, P=0.190$ |
| MosqTime               | $\chi^2_1 = 8.57, P=0.003$ |

**OocDens~ ParTime\*MosqTime\*Block**

|                        |                            |
|------------------------|----------------------------|
| ParTime:MosqTime:Block | $\chi^2_1 = 0.01, P=0.943$ |
| ParTime:MosqTime       | $\chi^2_1 = 0.01, P=0.931$ |
| ParTime:Block          | $\chi^2_1 = 0.01, P=0.925$ |
| MosqTime:Block         | $\chi^2_1 = 0.05, P=0.818$ |
| Block                  | $\chi^2_1 = 0.01, P=0.923$ |
| ParTime                | $\chi^2_1 = 1.00, P=0.318$ |
| MosqTime               | $\chi^2_1 = 1.91, P=0.167$ |

**SI Figure 6.** Night fed mosquitoes are less likely to be infected (A) but oocyst burdens are not influenced by time-of-day for mosquitoes or parasites (B). Data presented are mean  $\pm$  SEM over mice in each group, for the proportion of mosquitoes that are infected with oocysts (A) and oocyst burdens for all fed mosquitoes regardless of infection status (B). The data and analysis are summarised in Fig. 3 in the main text but split into blocks 1 (solid lines) and 2 (dashed lines) to reveal between-repeat variability. Groups consist of daytime (ZT8; closed symbols) and night time (ZT16; open symbols) feeding mosquitoes that fed on mice experiencing their day (ZT8; green) or night (ZT16; blue). Results of the statistical analyses including nonsignificant variables removed from each model are presented below each figure. Oocyst prevalences were analysed by binomial generalised linear models using the numbers of oocyst-infected and oocyst-uninfected mosquitoes as a two-vector variable (Inf,Uninf). Oocyst burdens were analysed by linear mixed models, with oocyst densities square root transformed to meet model assumptions. Mouse was used as a random effect (multiple mosquitoes fed on each mouse) ParTime: parasite time, ZT8 or ZT16; MosqTime: mosquito time, ZT8 or ZT16.

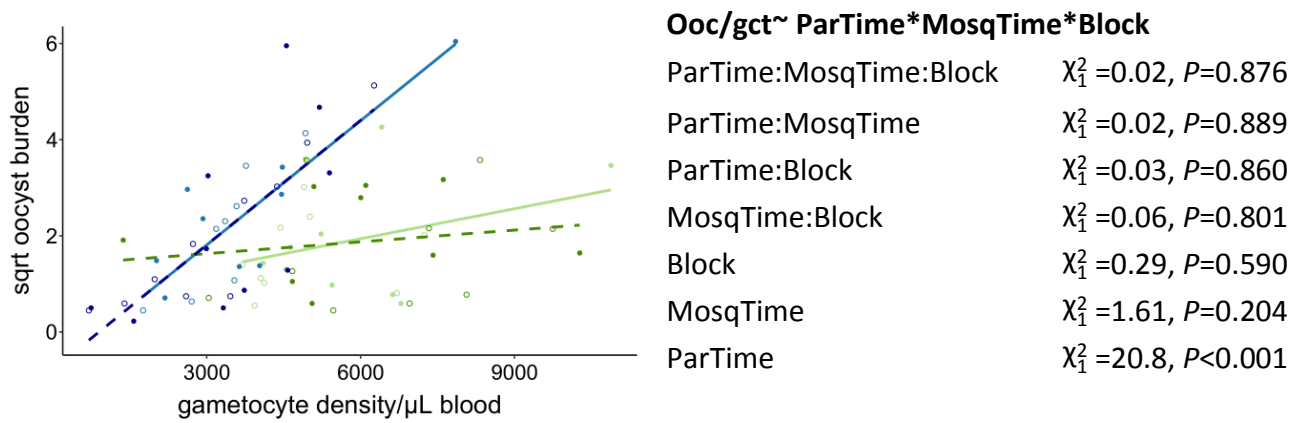

**SI Figure 7.** Gametocytes are more infective at night. Gametocytes taken up from hosts experiencing their night (ZT16; blue) are more likely to form oocysts than those taken up during the daytime (ZT8; green), regardless of time-of-day for mosquitoes (ZT8 closed, ZT16 open symbols). The data and analysis are summarised in Fig. 4 in the main text but split into blocks 1 (light symbols, solid lines) and 2 (dark symbols, dashed lines) blocks to reveal between-repeat variability. Gametocyte densities for each host are plotted against their corresponding mean oocyst burdens (square root transformed to meet model assumptions), and the fits are from linear regressions. Note the fits for night time (ZT16) gametocytes in both blocks are identical. Results of the statistical analyses including nonsignificant variables removed from the model are presented below each figure. The ratio of oocysts to gametocytes was analysed by linear mixed models, using mouse as a random effect (multiple mosquitoes fed on each mouse) with oocyst ratios square root transformed to meet model assumptions. ParTime: parasite time, ZT8 or ZT16; MosqTime: mosquito time, ZT8 or ZT16.

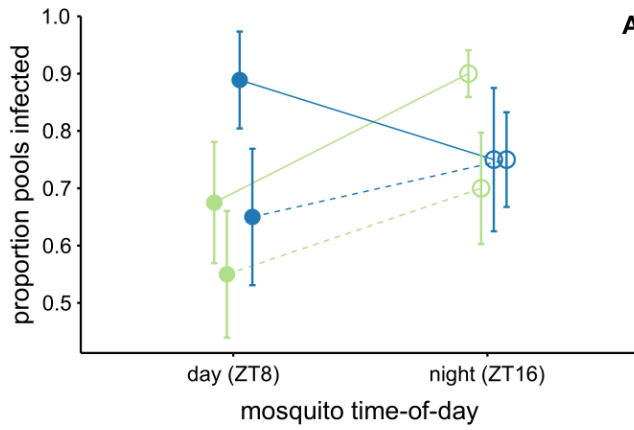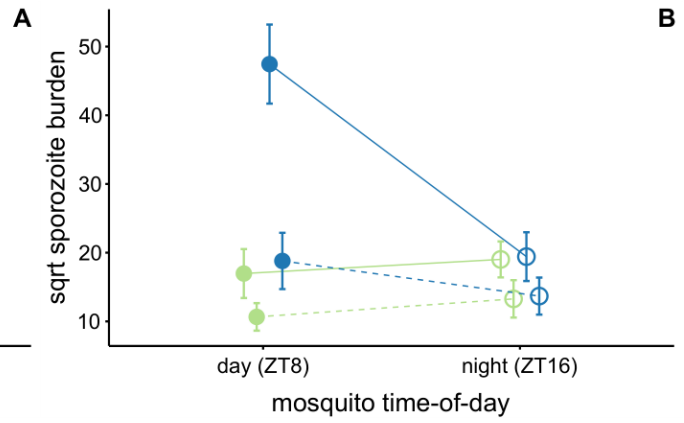

**(Inf, Uninf)~ParTime\*MosqTime\*Block**

**SporDens~ ParTime\*MosqTime\*Block**

|                        |                             |
|------------------------|-----------------------------|
| ParTime:MosqTime:Block | $\chi^2_1 = 2.355, P=0.125$ |
| ParTime:Block          | $\chi^2_1 = 0.004, P=0.946$ |
| MosqTime:Block         | $\chi^2_1 = 0.197, P=0.657$ |
| ParTime:MosqTime       | $\chi^2_1 = 2.573, P=0.109$ |
| ParTime                | $\chi^2_1 = 0.825, P=0.364$ |
| MosqTime               | $\chi^2_1 = 1.669, P=0.196$ |
| Block                  | $\chi^2_1 = 4.105, P=0.043$ |

|                        |                            |
|------------------------|----------------------------|
| ParTime:MosqTime:Block | $\chi^2_1 = 2.36, P=0.125$ |
| ParTime:Block          | $\chi^2_1 = 2.18, P=0.139$ |
| MosqTime:Block         | $\chi^2_1 = 2.39, P=0.122$ |
| ParTime:MosqTime       | $\chi^2_1 = 5.61, P=0.018$ |
| Block                  | $\chi^2_1 = 9.03, P=0.003$ |

**SI Figure 8.** Parasite and mosquito time-of-day do not affect sporozoite prevalence (A) but do affect sporozoite burdens (B). Each sample consisted of a pool of 5 mosquitoes that blood fed on the same mouse (4 samples per mouse): a positive pool requires that at least 1 of 5 mosquitoes were infected with sporozoites. Data presented are the mean  $\pm$  SEM over mice in each group, for the proportion of sporozoite positive pools (A) and sporozoite burdens for all fed mosquitoes regardless of infection status (B). The data and analysis are summarised in Fig. 5 in the main text but split into blocks 1 (solid lines) and 2 (dashed lines) blocks to reveal between-repeat variability. Groups are: daytime (ZT8; closed symbols) and night time (ZT16; open symbols) feeding mosquitoes that fed on mice experiencing their day (ZT8; green) or night (ZT16; blue). Data in B are square root transformed to meet model assumptions. Results of the statistical analyses including nonsignificant variables removed from the model are presented below each figure. Sporozoite prevalences were analysed by binomial generalised linear models using the numbers of sporozoite-infected and sporozoite-uninfected pools as a two-vector variable (Inf,Uninf). Sporozoite burdens were analysed by linear mixed models with sporozoite densities square root transformed to meet model assumptions. Mouse was fitted as a random effect (multiple pools of mosquitoes fed on each mouse). ParTime: parasite time, ZT8 or ZT16; MosqTime: mosquito time, ZT8 or ZT16.

151

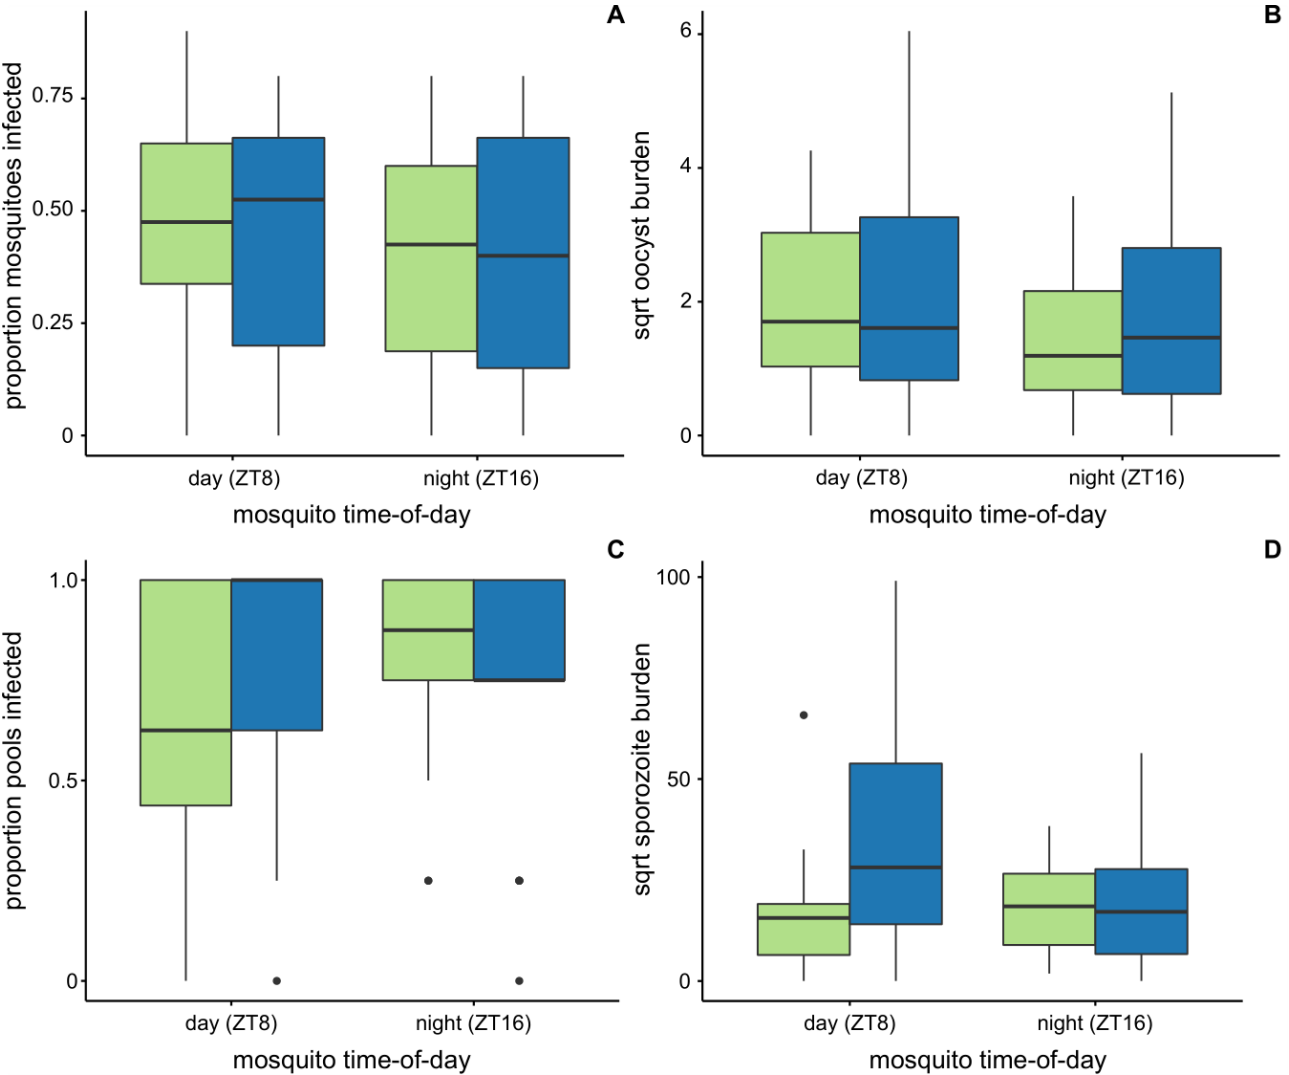

152

153

154

155

156

157

158

**SI Figure 9.** Box and whisker plot for oocyst prevalence (A), oocyst burden (B), sporozoite prevalence (C), and sporozoite burden (D) of all fed mosquitoes. Medians are shown, with the boxes illustrating 25-75 percentiles. Whiskers are Tukey style and outliers are plotted as dots. Groups consist of daytime (ZT8) and night time (ZT16) feeding mosquitoes that fed on mice experiencing their day (ZT8; green) or night (ZT16; blue).
